# Supplementary material for: Transcriptome-wide association study of inflammatory biologic age
Source: publisher site journal article supplement (doi:10.18632/aging.101321), 2017-11-11
Supplement: Supplementary file 1 [file aging-v9i11-101321-supplementary-material-SD2.xlsx]

## Sheet: Sheet1
Supplemental Table 2. Pearson Correlation Coefficients Among Inflammatory Biomarkers*
	MCP1	OPG	P-Selectin	ICAM	IL-6	CRP	LP-PLA-mass	LP-PLA-activity	TNFR2
MCP1	--	0.09	0.06	0.13	0.2	0.09	0.03	0.04	0.14
OPG	0.09	--	0.06	0.14	0.24	0.12	0.02	-0.01	0.17
P-Selectin	0.06	0.06	--	0.12	0.17	0.12	0.07	0.11	0.12
ICAM	0.13	0.14	0.12	--	0.18	0.23	0.02	0.05	0.23
IL-6	0.2	0.24	0.17	0.18	--	0.52	0.05	0.07	0.27
CRP	0.09	0.12	0.12	0.23	0.52	--	0.09	0.03	0.22
LP-PLA-mass	0.03	0.02	0.07	0.02	0.05	0.09	--	0.68	0.01
LP-PLA-activity	0.04	-0.01	0.11	0.05	0.07	0.03	0.68	--	0.07
TNFR2	0.14	0.17	0.12	0.23	0.27	0.22	0.01	0.07	--
*Correlations with P<0.01 are in bold font
Supplemental Table 2a: Correlation Inflammatory Markers with Age
	r	p
MCP1	0.17	<10-5
OPG	0.46	<10-5
P-Selectin	0.06	0.003
ICAM	0.08	1.66 x 10-5
IL-6	0.28	<10-5
CRP	0.1	5.49 x 10-8
LP-PLA-mass	-0.02	0.41
LP-PLA-activity	-0.02	0.31
TNFR2	0.37	< 10-5
