# Supplementary material for: Transcriptome-wide association study of inflammatory biologic age
Source: publisher site journal article supplement (doi:10.18632/aging.101321), 2017-11-11
Supplement: Supplementary file 2 [file aging-v9i11-101321-supplementary-material-SD1.xlsx]

## Sheet: Supp Table 1
Supplemental Table 1. Association between Inflammatory ∆age and gene expression
Affymetrix Transcript Cluster ID	Gene	Beta	SE	P-value	Methylation genes+	Age association, Peters et al, Nat Commun, 2015	Z-score of the association with age, Peters et al, Nat Commun, 2015
2357845	FCGR1A	0.0153689	0.00143468	3.47613e-26	No	Yes	11.85
2636626	GRAMD1C	-0.00976744	0.00106823	1.25905e-19	No	No	NA
3527514	PNP	0.00942447	0.0010875	8.10111e-18	Yes	No	NA
3161082	CD274	0.0140394	0.00162668	1.09552e-17	No	No	NA
3696142	DPEP2	-0.00514777	0.000603528	2.57234e-17	Yes	No	NA
3157660	TSTA3	0.0100964	0.00119258	4.37112e-17	No	No	NA
3941793	KREMEN1	0.0070958	0.000847237	9.27888e-17	Yes	No	NA
2951730	SLC26A8	0.00617241	0.00074015	1.24613e-16	Yes	Yes	11.44
4009849	ALAS2	0.0152244	0.00188234	9.55242e-16	No	No	NA
3709685	NDEL1	-0.00404806	0.000506008	1.92341e-15	Yes	No	NA
3061456	SAMD9L	0.00933974	0.00116866	2.05157e-15	No	Yes	7.21
3576284	RPS6KA5	-0.00492189	0.000619667	3.01907e-15	No	No	NA
3690550	SIAH1	-0.00462012	0.000582177	3.18607e-15	Yes	No	NA
2421925	GBP7	0.00538331	0.000683561	5.11608e-15	No	No	NA
2700828	SIAH2	0.00515837	0.000661245	9.11526e-15	No	Yes	7.95
2584258	KCNH7	0.00427658	0.000549946	1.10223e-14	No	No	NA
3628832	DAPK2	-0.00482929	0.00062115	1.11597e-14	Yes	No	NA
2828479	SLC22A4	0.00556507	0.00072279	1.98853e-14	No	Yes	8.41
2369463	FAM20B	0.00552358	0.000720351	2.52864e-14	No	No	NA
2964200	UBE2J1	0.00518543	0.000684716	5.1791e-14	No	No	NA
3090053	SLC25A37	0.00939957	0.00124616	6.50089e-14	Yes	No	NA
2438531	HDGF	0.00650006	0.000867759	9.60015e-14	Yes	No	NA
3651955	METTL9	0.00536692	0.000717779	1.06155e-13	Yes	No	NA
2421883	GBP1	0.00984049	0.00132202	1.36184e-13	Yes	Yes	9.99
2909404	CD2AP	0.00663352	0.000891838	1.41834e-13	Yes	No	NA
2420681	MCOLN3	0.00336492	0.000454217	1.76814e-13	No	No	NA
3219621	CTNNAL1	0.0104918	0.00142028	2.06395e-13	No	No	NA
3891163	GNAS	0.00410889	0.000557915	2.4331e-13	No	No	NA
3223928	STOM	0.00675264	0.000919658	2.8619e-13	No	Yes	14.87
3000953	UPP1	0.00376911	0.000514975	3.39794e-13	Yes	Yes	10.99
2782230	TIFA	0.00537443	0.000738867	4.71703e-13	No	No	NA
3549575	IFI27	0.0159967	0.00220949	6.02607e-13	Yes	No	NA
2874920	ACSL6	0.00357772	0.000495842	7.19194e-13	Yes	No	NA
2974610	VNN3	-0.00663361	0.000920135	7.5127e-13	Yes	Yes	9.75
2548776	ATL2	-0.00395345	0.000549966	8.72449e-13	No	No	NA
3497659	RAP2A	0.00627785	0.000873993	9.08131e-13	Yes	Yes	10.57
2422035	GBP5	0.010002	0.0013946	9.82533e-13	Yes	Yes	13.79
2777276	ABCG2	0.00678915	0.000951939	1.30728e-12	Yes	No	NA
3657253	AHSP	0.0165963	0.00233279	1.48129e-12	No	No	NA
3209726	ALDH1A1	-0.00692782	0.000978533	1.89175e-12	Yes	No	NA
3302805	HPS1	0.00311708	0.000441721	2.2272e-12	No	No	NA
2881672	TNIP1	0.00381915	0.00054132	2.24961e-12	Yes	No	NA
2906333	DAAM2	-0.00389496	0.000553332	2.52038e-12	No	Yes	8.24
3507199	FLT3	-0.00648661	0.000922208	2.61615e-12	Yes	No	NA
2515933	ZAK	0.00398737	0.000567629	2.79056e-12	Yes	No	NA
2708922	IGF2BP2	0.00941638	0.00134244	2.99749e-12	Yes	No	NA
3068097	DOCK4	0.00696884	0.000994461	3.14233e-12	Yes	No	NA
2400655	RAP1GAP	0.00636395	0.000909267	3.3386e-12	Yes	No	NA
2435005	SELENBP1	0.0120205	0.00171864	3.45329e-12	No	No	NA
2364677	PBX1	0.00819637	0.00117501	3.93242e-12	Yes	No	NA
3728889	TMEM49	-0.00290125	0.00041605	3.99397e-12	Yes	No	NA
3132940	ANK1	0.00748468	0.00107428	4.1699e-12	Yes	No	NA
3299469	ANKRD22	0.0111369	0.00160047	4.42661e-12	Yes	Yes	11.3
3893072	C20orf11	0.00627012	0.000901971	4.64639e-12	No	No	NA
3568534	SPTB	0.00985521	0.0014181	4.7106e-12	Yes	No	NA
3708938	ATP1B2	0.00549115	0.000791344	5.0699e-12	No	No	NA
3720695	THRA	-0.00338561	0.000488284	5.26049e-12	Yes	No	NA
3820865	CARM1	0.00567572	0.000821834	6.36437e-12	No	No	NA
2986999	GPR146	0.0108378	0.00156967	6.43766e-12	No	No	NA
3119945	GRINA	0.00766078	0.00111213	7.19405e-12	Yes	No	NA
2896545	GMPR	0.0110679	0.0016107	8.08199e-12	Yes	No	NA
3621029	EPB42	0.0092669	0.00135378	9.68082e-12	No	No	NA
3732793	ARSG	-0.00369224	0.000539916	1.01311e-11	Yes	Yes	6.83
2634091	NFKBIZ	0.00318608	0.000467299	1.1653e-11	Yes	No	NA
3610958	IGF1R	-0.00624998	0.000917053	1.18766e-11	Yes	No	NA
2809128	ITGA1	0.00293652	0.000431504	1.27134e-11	No	No	NA
3092808	NRG1	0.00417973	0.00061658	1.52153e-11	No	Yes	9.88
3535780	PTGER2	0.00496371	0.000734449	1.74827e-11	No	Yes	13.14
3804358	C18orf10	0.00905123	0.00134224	1.93505e-11	No	No	NA
3822074	RAD23A	0.0047451	0.000703782	1.94979e-11	Yes	No	NA
2340350	DNAJC6	0.00518956	0.000770711	2.06931e-11	Yes	No	NA
3528013	RPGRIP1	-0.00277548	0.000412899	2.23664e-11	Yes	No	NA
2805786	TARS	0.00417212	0.000620841	2.26421e-11	No	No	NA
3154185	TMEM71	-0.00416199	0.000620309	2.43112e-11	Yes	No	NA
3697933	PKD1L3	0.00228276	0.000344106	4.0334e-11	No	No	NA
2774365	CCNI	0.00494837	0.000748798	4.77671e-11	Yes	No	NA
2905432	TBC1D22B	0.00557324	0.000844186	4.9872e-11	Yes	No	NA
2692060	PARP9	0.00791785	0.00119933	4.9876e-11	Yes	Yes	8.5
3789947	NEDD4L	0.00745566	0.0011295	5.02208e-11	Yes	No	NA
3759006	SLC4A1	0.0111933	0.00169581	5.0315e-11	No	No	NA
4007437	SLC38A5	0.00663872	0.00100687	5.27636e-11	No	No	NA
2737318	DAPP1	0.00391711	0.00059448	5.4272e-11	Yes	No	NA
3559690	HEATR5A	-0.00806441	0.00122402	5.45228e-11	Yes	No	NA
2362201	CD1C	-0.00670627	0.00102099	6.22441e-11	Yes	No	NA
3114832	SQLE	0.00433496	0.000662343	7.26579e-11	Yes	No	NA
3120066	MAF1	0.0055877	0.000856181	8.20823e-11	No	No	NA
3755655	FBXL20	-0.00347267	0.000532104	8.20842e-11	No	No	NA
2370433	CACNA1E	0.00305494	0.000468663	8.64439e-11	No	No	NA
2365958	MPZL1	-0.00560534	0.000861327	9.26626e-11	Yes	No	NA
3226661	ZER1	0.00554538	0.000854122	1.02404e-10	No	No	NA
2628682	ARL6IP5	0.00329175	0.00050724	1.04395e-10	Yes	No	NA
2512790	SLC4A10	-0.0081827	0.00126338	1.13385e-10	No	No	NA
3318443	TRIM22	0.00621467	0.000960407	1.17894e-10	No	No	NA
3427876	APAF1	-0.00355949	0.000551708	1.33462e-10	No	No	NA
3321512	PDE3B	-0.00394251	0.000611623	1.38561e-10	No	Yes	-12.32
3087501	ZDHHC2	0.00657543	0.00102572	1.74213e-10	Yes	No	NA
3962530	CYB5R3	0.00368024	0.000575597	1.94105e-10	Yes	No	NA
3216931	C9orf156	-0.00344055	0.000538119	1.94248e-10	No	No	NA
2619761	ABHD5	-0.00441037	0.000691335	2.1275e-10	Yes	Yes	6.94
3712922	C17orf39	0.00541289	0.000850518	2.34663e-10	No	No	NA
3890180	CASS4	-0.00399282	0.000627991	2.44065e-10	Yes	No	NA
2592268	STAT1	0.00608592	0.0009613	2.90297e-10	Yes	Yes	11.72
2340695	SGIP1	0.00325185	0.00051437	3.07271e-10	Yes	No	NA
2849469	ANKH	0.00544436	0.000861274	3.08683e-10	Yes	No	NA
2969467	CDK19	-0.00276764	0.00043862	3.31929e-10	Yes	No	NA
3722152	PSME3	-0.00358411	0.000568811	3.51049e-10	No	No	NA
2451593	CHI3L1	-0.00946022	0.00150422	3.78671e-10	Yes	No	NA
3373962	UBE2L6	0.00453285	0.000725746	4.97828e-10	Yes	No	NA
3467315	IKBIP	-0.00503054	0.000806436	5.22851e-10	No	No	NA
2639054	PARP14	0.00640602	0.00102981	5.83265e-10	No	Yes	6.87
3148463	ANGPT1	-0.00476125	0.000766654	6.21559e-10	Yes	No	NA
3883013	TP53INP2	-0.00273321	0.000440781	6.59976e-10	Yes	No	NA
2737840	CISD2	0.00897022	0.00144704	6.67671e-10	No	No	NA
3028977	GSTK1	0.00394878	0.000637307	6.8011e-10	No	No	NA
2655476	AP2M1	0.00500256	0.000807629	6.883e-10	No	No	NA
2907459	CNPY3	-0.00295225	0.000477474	7.37597e-10	No	No	NA
3786868	SLC14A1	0.01022	0.00165295	7.38175e-10	Yes	No	NA
2612813	PLCL2	0.00491156	0.000795501	7.79536e-10	Yes	No	NA
2924514	NCOA7	0.00308272	0.000499395	7.85703e-10	No	No	NA
2390180	TRIM58	0.00691754	0.00112344	8.64937e-10	No	No	NA
3544625	FLVCR2	0.00294947	0.00047901	8.65107e-10	Yes	Yes	8.38
2409104	SLC2A1	0.00367073	0.000597493	9.42897e-10	Yes	No	NA
2730714	DCK	0.00409263	0.00066626	9.47975e-10	No	Yes	-8.09
3642654	HBM	0.00831618	0.00135525	9.86574e-10	No	No	NA
2896177	JARID2	-0.00370332	0.000604069	1.02151e-09	Yes	No	NA
3882854	ITCH	-0.00270983	0.000442398	1.0557e-09	Yes	No	NA
3836217	KLC3	0.00328378	0.000536918	1.11828e-09	No	No	NA
2510464	TNFAIP6	0.00865453	0.00141561	1.13471e-09	Yes	Yes	9.85
2750594	SC4MOL	0.00541562	0.000886013	1.14372e-09	No	No	NA
3752002	CRLF3	-0.00271461	0.000444212	1.15278e-09	Yes	Yes	-9.49
3037193	EIF2AK1	0.00718007	0.00117564	1.17929e-09	No	No	NA
2434527	GOLPH3L	0.00465287	0.00076265	1.2271e-09	No	No	NA
3550077	GLRX5	0.00525481	0.000862433	1.28844e-09	No	No	NA
3762519	SPAG9	-0.00315896	0.000518969	1.33703e-09	Yes	No	NA
3189932	STXBP1	0.00308985	0.000508811	1.45981e-09	Yes	No	NA
3680953	CPPED1	-0.00395909	0.000654381	1.67612e-09	No	No	NA
2584207	IFIH1	0.00612388	0.00101544	1.88635e-09	No	No	NA
2501204	IL1RN	0.00374287	0.000620799	1.90533e-09	Yes	No	NA
2699623	PLSCR4	0.00347375	0.000576539	1.95158e-09	No	No	NA
3818860	MCOLN1	0.005643	0.000938163	2.07713e-09	No	No	NA
3673091	BANP	-0.00291249	0.000484759	2.16487e-09	Yes	No	NA
3220740	C9orf84	0.00469697	0.000784571	2.46579e-09	No	No	NA
3502497	CUL4A	0.00422217	0.000705537	2.50084e-09	Yes	No	NA
3770361	CD300LF	-0.00300781	0.000502939	2.56005e-09	Yes	No	NA
3569374	VTI1B	0.00560414	0.000939036	2.76088e-09	No	No	NA
2777639	GPRIN3	0.00359956	0.000603616	2.83924e-09	Yes	No	NA
2720145	LAP3	0.00494204	0.000829815	2.97483e-09	No	No	NA
3261255	DPCD	0.00690059	0.00115887	2.99262e-09	No	No	NA
3434413	RNF10	0.00721709	0.00121445	3.21567e-09	No	No	NA
3724505	MYL4	0.00893293	0.00150549	3.39617e-09	No	No	NA
2904877	MAPK14	0.00366578	0.000618235	3.48169e-09	Yes	Yes	9.66
3814978	CDC34	0.00789817	0.00133541	3.80908e-09	No	No	NA
2699726	PLSCR1	0.00580075	0.000981028	3.84347e-09	Yes	No	NA
2411575	SPATA6	-0.00434223	0.000735838	4.12624e-09	Yes	No	NA
3043264	JAZF1	0.00670134	0.00113877	4.54945e-09	Yes	No	NA
3866276	SLC1A5	0.00602449	0.00102376	4.54973e-09	Yes	No	NA
3866302	AP2S1	0.00420276	0.000714715	4.66944e-09	No	No	NA
3833827	EGLN2	-0.00279988	0.000476393	4.75598e-09	No	No	NA
3840372	ZNF701	-0.00602683	0.00102564	4.78644e-09	No	No	NA
2504328	GYPC	0.00686806	0.0011727	5.37633e-09	Yes	No	NA
3417309	PA2G4	0.00576495	0.000985088	5.51837e-09	Yes	No	NA
3250278	HK1	0.00425244	0.000728015	5.89272e-09	Yes	No	NA
2792800	DDX60	0.00824037	0.00141178	6.04378e-09	No	No	NA
3090006	SLC25A37	0.00451932	0.000776429	6.65161e-09	Yes	No	NA
3607447	ABHD2	-0.00433846	0.000746923	7.14722e-09	Yes	No	NA
3473727	WSB2	0.00351283	0.000604986	7.23133e-09	Yes	No	NA
3815014	BSG	0.00757189	0.00130533	7.47892e-09	No	No	NA
3293724	C10orf54	-0.00276364	0.000476678	7.61328e-09	Yes	No	NA
3863189	CEACAM4	-0.00616914	0.00106472	7.77486e-09	Yes	No	NA
2451463	ADIPOR1	0.00525549	0.000908746	8.28877e-09	No	No	NA
2701033	P2RY14	0.00669053	0.00115712	8.34682e-09	Yes	No	NA
2622239	RNF123	0.00384128	0.000665048	8.65073e-09	No	No	NA
2439554	AIM2	0.00747902	0.00129568	8.83849e-09	Yes	No	NA
2957700	GCLC	0.00647187	0.00112211	9.08353e-09	Yes	No	NA
2671652	ZDHHC3	0.00408972	0.000709607	9.31133e-09	Yes	No	NA
3942531	OSBP2	0.00508693	0.000882949	9.42478e-09	No	No	NA
3674559	DEF8	-0.0021987	0.000382254	9.95392e-09	No	No	NA
3740367	SLC43A2	-0.00339167	0.00058999	1.01443e-08	Yes	No	NA
3064591	FIS1	0.00788255	0.00137259	1.04977e-08	Yes	No	NA
3605268	TM6SF1	-0.00375981	0.000654905	1.06093e-08	Yes	No	NA
3400034	WNK1	0.00576529	0.00100647	1.14269e-08	Yes	No	NA
3466206	TMCC3	-0.00345331	0.000604383	1.24279e-08	No	No	NA
3331355	SERPING1	0.00734583	0.00128566	1.24374e-08	Yes	No	NA
3181240	TMOD1	0.00850566	0.00148893	1.25122e-08	No	No	NA
2509740	MBD5	0.00291614	0.000511108	1.3037e-08	No	No	NA
2866704	ARRDC3	-0.00405261	0.000710513	1.31693e-08	No	No	NA
3973803	XK	0.00678939	0.00119086	1.33649e-08	No	No	NA
3766960	SMURF2	-0.00290266	0.000509154	1.3388e-08	Yes	No	NA
2968232	SNX3	0.00499483	0.000876348	1.34923e-08	No	No	NA
2732391	CCNG2	-0.00299173	0.000524973	1.35524e-08	Yes	No	NA
2466141	ACP1	0.00637221	0.00111817	1.35569e-08	No	No	NA
3311269	FAM53B	-0.00254056	0.000445881	1.36297e-08	Yes	Yes	8.47
3802980	DSC2	0.00692961	0.0012186	1.45486e-08	Yes	Yes	10.7
3923354	AGPAT3	0.00253668	0.000446186	1.46597e-08	Yes	Yes	7.69
3005444	TPST1	-0.00673325	0.00118468	1.47987e-08	Yes	Yes	11.19
3681674	NTAN1	0.0048172	0.000850012	1.62649e-08	Yes	No	NA
3456666	NFE2	0.0056721	0.00100097	1.63199e-08	Yes	No	NA
2409507	SLC6A9	0.00366995	0.000649252	1.76917e-08	Yes	No	NA
3482977	POLR1D	0.00619232	0.00109663	1.83001e-08	No	No	NA
3089102	EPB49	0.00836142	0.00148287	1.91602e-08	Yes	No	NA
2790324	RNF175	0.00376988	0.000670488	2.10092e-08	Yes	No	NA
3360417	HBD	0.00842635	0.00150112	2.21438e-08	No	No	NA
3511698	EPSTI1	0.00938902	0.00167417	2.28127e-08	Yes	No	NA
2732844	ANXA3	0.0059213	0.00105783	2.42279e-08	No	No	NA
3466687	HAL	-0.00367077	0.000655803	2.42578e-08	Yes	No	NA
3161113	PDCD1LG2	0.00536754	0.000959058	2.43552e-08	No	No	NA
3905145	TGM2	0.00348002	0.000622283	2.49618e-08	Yes	No	NA
2338719	NFIA	0.00479559	0.000860521	2.7877e-08	Yes	No	NA
2831519	C5orf32	0.00502609	0.000902331	2.83187e-08	Yes	No	NA
2324097	PINK1	0.00376591	0.000678701	3.19652e-08	No	No	NA
3226369	CIZ1	0.00229181	0.000413612	3.33883e-08	Yes	No	NA
2345617	PKN2	-0.00279807	0.000505063	3.3563e-08	No	No	NA
3823901	SIN3B	-0.00184085	0.000332436	3.4059e-08	No	No	NA
3728964	PRR11	0.00358801	0.00064827	3.45821e-08	No	No	NA
2728448	POLR2B	-0.00281828	0.0005092	3.45869e-08	No	No	NA
2571510	IL1B	0.00465162	0.000841135	3.5485e-08	Yes	No	NA
3473750	VSIG10	0.0031466	0.000569503	3.64985e-08	No	No	NA
3263624	MXI1	0.00501957	0.000909491	3.77634e-08	Yes	No	NA
2468351	RSAD2	0.0122492	0.00221975	3.79381e-08	Yes	No	NA
3862661	BLVRB	0.00854909	0.00155038	3.88164e-08	No	No	NA
3758615	DUSP3	0.00262427	0.000476065	3.92109e-08	Yes	Yes	9.34
3703885	SLC7A5	0.00546872	0.000992646	3.99147e-08	Yes	No	NA
3147286	RRM2B	-0.00327352	0.000594298	4.01457e-08	Yes	No	NA
4003954	TAB3	0.00369969	0.000672854	4.23868e-08	No	No	NA
2749380	TMEM144	0.0043001	0.000782568	4.32642e-08	Yes	No	NA
3901055	CD93	-0.00475715	0.000866064	4.37549e-08	No	No	NA
3909395	DPM1	-0.00374727	0.000683601	4.65734e-08	No	No	NA
3886765	PI3	0.00972856	0.00177482	4.66366e-08	Yes	No	NA
3443804	KLRB1	-0.00706354	0.00128986	4.80129e-08	Yes	Yes	-18.72
3226237	DPM2	0.00632664	0.00115677	4.99231e-08	Yes	No	NA
2383726	ARF1	0.00299457	0.000549477	5.55959e-08	Yes	No	NA
3569257	PLEK2	0.006506	0.00119391	5.57677e-08	No	No	NA
2458082	WDR26	0.0040115	0.000736767	5.71985e-08	Yes	No	NA
2860614	CCDC125	-0.00398926	0.000733455	5.90473e-08	No	No	NA
3203135	TOPORS	-0.00316466	0.000581949	5.93675e-08	No	No	NA
3456688	GPR84	0.00436606	0.000803125	5.99266e-08	Yes	No	NA
3664810	CMTM1	0.00323708	0.000595555	6.02373e-08	No	No	NA
3142967	CA1	0.00887027	0.00163355	6.20441e-08	No	No	NA
2892979	CDYL	0.00260758	0.000481446	6.70112e-08	Yes	No	NA
3822122	NFIX	0.00411448	0.000761017	7.06512e-08	Yes	No	NA
2784113	CCNA2	0.00296264	0.000548271	7.18069e-08	No	No	NA
3945006	H1F0	0.00432962	0.000801565	7.26599e-08	No	No	NA
2618598	EIF1B	0.00521831	0.000966568	7.37309e-08	No	No	NA
3852832	EMR3	-0.00405539	0.000751505	7.47283e-08	Yes	No	NA
3743486	GABARAP	0.00497914	0.000922946	7.53623e-08	No	No	NA
3838886	AP2A1	0.00287796	0.000533782	7.66938e-08	Yes	No	NA
3203855	DCAF12	0.00574131	0.00106495	7.68944e-08	No	No	NA
2421995	GBP4	0.00624378	0.00115876	7.81126e-08	No	No	NA
3920850	KCNJ15	0.00576941	0.00107106	7.88393e-08	Yes	No	NA
3185205	HSDL2	-0.002894	0.000537915	8.17495e-08	No	No	NA
3015769	POP7	0.0051669	0.000960411	8.18132e-08	No	No	NA
3061484	HEPACAM2	0.00481381	0.000894882	8.20903e-08	Yes	No	NA
2534564	UBE2F	0.00664192	0.00123576	8.41371e-08	Yes	Yes	8.93
2372858	RGS2	-0.00415922	0.000774645	8.67476e-08	No	No	NA
3090512	DOCK5	-0.00395874	0.000738023	8.92626e-08	Yes	No	NA
3771543	UBE2O	0.00555077	0.00103522	9.02701e-08	Yes	No	NA
2873897	MARCH3	0.00431026	0.000805398	9.54558e-08	Yes	No	NA
2383859	GUK1	0.00794232	0.00148447	9.62138e-08	Yes	No	NA
3334749	PPP2R5B	0.00291947	0.00054572	9.6477e-08	No	No	NA
3610804	IGF1R	-0.00447042	0.000836304	9.8777e-08	Yes	No	NA
3444252	CSDA	0.00760376	0.00142289	9.96137e-08	No	No	NA
3502710	TFDP1	0.00460999	0.000864662	1.06546e-07	Yes	No	NA
3421300	MDM2	-0.00323726	0.000607598	1.08641e-07	No	No	NA
3674960	LUC7L	-0.00217358	0.000408189	1.10449e-07	No	Yes	-9.32
3271687	PPP2R2D	-0.00335993	0.000631309	1.1212e-07	No	No	NA
2531377	SP100	0.00370588	0.000696763	1.14245e-07	No	No	NA
3563922	MAP4K5	0.00437097	0.000822026	1.15117e-07	No	No	NA
3035892	GNA12	0.00381381	0.000717384	1.15776e-07	Yes	No	NA
3304012	MGEA5	-0.00256162	0.000481911	1.16237e-07	Yes	No	NA
2857131	DHX29	0.00289494	0.000545321	1.20636e-07	Yes	No	NA
3257670	PCGF5	0.00482258	0.000908473	1.20791e-07	Yes	No	NA
2528426	DNAJB2	0.00329273	0.000620378	1.2134e-07	No	No	NA
3589410	C15orf54	-0.0100053	0.0018858	1.22672e-07	Yes	No	NA
3843525	ZNF586	-0.00343856	0.000648535	1.2506e-07	No	No	NA
3890597	RBM38	0.0062391	0.00118088	1.38284e-07	Yes	No	NA
2594497	CLK1	-0.00325577	0.000616966	1.43126e-07	Yes	No	NA
2734784	AFF1	0.00287511	0.000545158	1.45587e-07	Yes	No	NA
3957003	ASCC2	0.00616927	0.00117051	1.48227e-07	Yes	No	NA
3953556	KLHL22	-0.00210022	0.000398586	1.49338e-07	Yes	No	NA
3846783	UBXN6	0.00686043	0.00130435	1.57192e-07	No	No	NA
2599901	C2orf24	0.00469222	0.000892598	1.59613e-07	No	No	NA
3019519	IFRD1	-0.00350618	0.000667024	1.59917e-07	Yes	No	NA
3667858	HP	0.00968436	0.00184256	1.60378e-07	Yes	Yes	8.05
3156541	SLC45A4	-0.00507242	0.000965465	1.62161e-07	Yes	No	NA
2553282	PSME4	0.00379828	0.000723673	1.66792e-07	No	No	NA
2428079	C1orf183	-0.00291808	0.000556177	1.68545e-07	No	No	NA
2334279	UROD	0.00324472	0.000618493	1.6899e-07	No	No	NA
3674886	NPRL3	0.00666645	0.00127081	1.69307e-07	No	No	NA
3315675	IFITM1	0.00521346	0.000993833	1.69326e-07	Yes	No	NA
3319898	ZNF143	-0.0030286	0.000577664	1.72036e-07	No	No	NA
3602116	C15orf39	-0.00338373	0.000645529	1.73009e-07	No	No	NA
2841184	ERGIC1	-0.00295438	0.000563994	1.76263e-07	Yes	Yes	7.95
3209623	ZFAND5	-0.0036883	0.000704307	1.77723e-07	No	No	NA
2594812	TRAK2	0.00616942	0.00117871	1.8034e-07	No	No	NA
3798291	PPP4R1	-0.00315107	0.000602723	1.86202e-07	No	No	NA
3409127	ARNTL2	0.00241617	0.000462462	1.89694e-07	Yes	No	NA
3260018	ZFYVE27	-0.00207143	0.000396672	1.92312e-07	No	No	NA
2539125	CMPK2	0.00290649	0.000556831	1.94721e-07	No	No	NA
3666409	CDH1	0.00387642	0.000742768	1.95559e-07	Yes	No	NA
3821015	LDLR	0.002307	0.000442138	1.96673e-07	Yes	No	NA
3381925	PGM2L1	0.00500025	0.000958363	1.97018e-07	No	No	NA
3105600	CA2	0.00595611	0.00114644	2.21701e-07	Yes	No	NA
3895232	UBOX5	-0.00193886	0.000373263	2.22853e-07	No	No	NA
3687452	YPEL3	0.00378599	0.000729031	2.24243e-07	Yes	No	NA
3695867	RANBP10	0.00494256	0.000952138	2.26842e-07	No	No	NA
2765590	ARAP2	0.00297501	0.000574148	2.38444e-07	Yes	No	NA
3995804	SLC6A8	0.004694	0.000906603	2.43613e-07	No	No	NA
2376894	DYRK3	0.00274924	0.000531023	2.44022e-07	No	No	NA
2350880	AMPD2	-0.00238605	0.000462686	2.71677e-07	Yes	No	NA
3352503	ARHGEF12	0.00739597	0.00143442	2.72951e-07	Yes	No	NA
2464005	AKT3	-0.00337957	0.00065554	2.73909e-07	No	No	NA
3843463	ZNF776	-0.00215957	0.000419499	2.84841e-07	No	No	NA
3738901	NARF	0.00252103	0.000489767	2.85707e-07	Yes	No	NA
2953570	TREM1	-0.00472821	0.000919229	2.91384e-07	Yes	No	NA
3536706	LGALS3	0.00448516	0.000872052	2.92073e-07	Yes	No	NA
3985260	GPRASP1	-0.00435496	0.000846783	2.92492e-07	No	No	NA
3560575	EAPP	-0.00323014	0.000628619	2.9949e-07	No	No	NA
3281068	PIP4K2A	0.00485966	0.00094775	3.17116e-07	Yes	No	NA
3124537	CTSB	0.00360369	0.000702863	3.17816e-07	Yes	No	NA
3679533	CARHSP1	0.00501775	0.000979482	3.25084e-07	Yes	No	NA
3759077	SLC25A39	0.00732729	0.00143057	3.2663e-07	No	No	NA
2969289	WASF1	0.00270227	0.000527677	3.28137e-07	No	No	NA
3965984	NCAPH2	0.00431915	0.000845003	3.45207e-07	No	No	NA
2345816	GBP6	0.00306561	0.000599827	3.46236e-07	No	No	NA
3249587	SIRT1	-0.00273857	0.000535863	3.46689e-07	No	No	NA
3854627	JAK3	0.002093	0.000409965	3.56373e-07	Yes	No	NA
3317071	LSP1	-0.0028545	0.000559541	3.63562e-07	Yes	No	NA
2682271	PROK2	0.00425324	0.000834083	3.67761e-07	No	No	NA
2694520	KIAA1257	-0.00363595	0.000713197	3.7007e-07	Yes	No	NA
3309124	C10orf46	-0.00195757	0.000384087	3.72801e-07	No	No	NA
2842707	TSPAN17	0.0023045	0.000452711	3.85175e-07	No	Yes	9.45
2949148	BAT3	0.00338967	0.000667515	4.10887e-07	Yes	No	NA
2599153	TNS1	0.00359066	0.000708753	4.37045e-07	Yes	No	NA
3404636	GABARAPL1	-0.00312491	0.000616984	4.40121e-07	No	Yes	10.86
3646434	UBN1	-0.00304711	0.000602093	4.49267e-07	No	No	NA
2769063	USP46	0.0032279	0.000638534	4.62688e-07	No	No	NA
3381965	KCNE3	-0.00346878	0.000686294	4.64639e-07	Yes	No	NA
3338453	PPFIA1	-0.00279617	0.000553368	4.6796e-07	Yes	No	NA
3228463	RALGDS	0.00325038	0.000643732	4.77066e-07	Yes	Yes	10.99
2778856	TSPAN5	0.00753094	0.00149542	5.10999e-07	Yes	No	NA
3662387	HERPUD1	-0.00259035	0.000514438	5.1283e-07	Yes	No	NA
3389330	CASP5	0.00642346	0.00127632	5.19487e-07	No	No	NA
2772017	YTHDC1	-0.00219161	0.000435525	5.21332e-07	No	Yes	-9.87
2583602	RBMS1	0.00319286	0.000634878	5.29527e-07	Yes	No	NA
2777070	HSD17B11	-0.00290804	0.000578458	5.34625e-07	Yes	No	NA
3672059	KIAA0513	-0.00356473	0.000709831	5.49398e-07	Yes	No	NA
2362394	IFI16	0.00421884	0.000841262	5.69733e-07	No	No	NA
2862380	ANKRA2	-0.00315439	0.000629741	5.87201e-07	No	No	NA
3173673	PIP5K1B	0.00485546	0.000969621	5.91559e-07	Yes	No	NA
3432438	OAS1	0.00709683	0.00142053	6.28099e-07	No	Yes	7.06
3169094	DCAF10	0.00471636	0.000944577	6.37226e-07	No	No	NA
3568080	WDR89	-0.0036688	0.000735156	6.45758e-07	No	Yes	-8.56
2591421	TFPI	0.00374872	0.0007524	6.73249e-07	No	No	NA
2743315	PHF17	-0.00231221	0.00046436	6.83724e-07	Yes	No	NA
3235932	PRPF18	-0.00294057	0.00059064	6.86227e-07	No	No	NA
3766651	ERN1	-0.00311222	0.000625426	6.94911e-07	Yes	No	NA
3420079	LEMD3	-0.00217735	0.000437804	7.04956e-07	Yes	No	NA
2423625	GCLM	0.00324607	0.000653239	7.20091e-07	No	No	NA
2440625	DEDD	0.00177476	0.000357268	7.25945e-07	Yes	Yes	7.8
3144760	RBM12B	-0.00399499	0.000805167	7.48186e-07	No	No	NA
3507003	LNX2	0.00378715	0.000763593	7.56005e-07	Yes	No	NA
3077168	KEL	0.00269356	0.000543216	7.60288e-07	Yes	No	NA
3075932	PARP12	0.00319479	0.000644329	7.61158e-07	Yes	No	NA
3742783	NLRP1	-0.00272716	0.000550101	7.64097e-07	Yes	No	NA
3883547	PHF20	-0.00245886	0.000496241	7.74255e-07	No	No	NA
3512948	C13orf18	-0.00511573	0.001033	7.84885e-07	Yes	No	NA
3644887	TBC1D24	0.00351843	0.000711186	8.05168e-07	No	No	NA
2423017	EVI5	-0.00258795	0.000523298	8.12592e-07	Yes	No	NA
2756404	ZNF721	-0.00530309	0.00107258	8.17562e-07	No	Yes	-7.77
2779823	SLC39A8	0.00301003	0.000609125	8.28866e-07	No	No	NA
3320819	MICALCL	0.00622728	0.00126063	8.36197e-07	Yes	No	NA
3890109	C20orf108	0.00372825	0.000754852	8.39493e-07	No	No	NA
3957374	SEC14L4	0.00381994	0.000774344	8.65084e-07	No	No	NA
3941010	SRRD	0.00642542	0.00130355	8.82568e-07	No	No	NA
4045381	TLR5	0.00417875	0.000849282	9.23017e-07	Yes	No	NA
3891723	C20orf197	-0.0026232	0.000533164	9.24275e-07	Yes	Yes	6.99
3264948	CASP7	0.00268553	0.000547508	9.97307e-07	No	No	NA
2596763	FZD5	0.00390256	0.000795689	9.99167e-07	No	No	NA
2934308	IGF2R	-0.00435989	0.000889046	1.00233e-06	Yes	No	NA
3676165	HAGH	0.00664474	0.00135537	1.00974e-06	No	No	NA
2997272	EEPD1	-0.00216683	0.000442022	1.01211e-06	Yes	No	NA
3571667	ENTPD5	0.00411269	0.00083924	1.02021e-06	No	No	NA
2617563	MYD88	0.00248991	0.000508432	1.03716e-06	No	Yes	7.71
2531233	SP140	0.00417883	0.000853408	1.04023e-06	Yes	No	NA
3743340	ASGR2	0.00270358	0.000552141	1.04074e-06	Yes	Yes	11.74
3235726	OPTN	0.00601932	0.00122987	1.05277e-06	No	No	NA
2320374	FBXO6	0.00203661	0.00041622	1.05886e-06	Yes	Yes	11.58
3565524	GCH1	0.00292207	0.000597236	1.06134e-06	No	No	NA
3825586	RFXANK	0.0024319	0.000497136	1.06571e-06	No	No	NA
2945882	CMAH	0.00282559	0.00057808	1.08708e-06	Yes	No	NA
3529547	DCAF11	0.00240469	0.000492476	1.11486e-06	No	No	NA
3848020	TNFSF14	-0.00249088	0.000510169	1.11711e-06	No	No	NA
3937130	C22orf25	0.0030416	0.000623135	1.12461e-06	No	No	NA
2766289	TMEM156	0.00433641	0.000888415	1.12497e-06	Yes	Yes	-10.3
2907396	FLJ38717	-0.00383376	0.000785464	1.126e-06	No	No	NA
3733275	KCNJ2	0.00395281	0.000810764	1.15735e-06	No	No	NA
2791419	FAM198B	0.00509434	0.00104514	1.16373e-06	No	No	NA
2765865	RELL1	-0.00285154	0.000585036	1.16481e-06	Yes	No	NA
3851293	ZNF44	-0.00228462	0.000469715	1.22643e-06	No	No	NA
3346548	BIRC3	0.00404831	0.000832674	1.23887e-06	Yes	No	NA
3734413	RAB37	-0.00214951	0.000442152	1.24105e-06	Yes	Yes	9.29
3728509	DYNLL2	0.00255669	0.000525972	1.2447e-06	No	No	NA
2790368	SFRP2	0.00615308	0.00126614	1.25192e-06	Yes	No	NA
2881554	DCTN4	0.00272023	0.000559815	1.25545e-06	No	No	NA
3708201	C17orf49	0.00365114	0.000751504	1.25999e-06	No	No	NA
3908358	SULF2	-0.00352696	0.000726331	1.27635e-06	No	No	NA
2821981	FAM174A	-0.00526066	0.00108438	1.30578e-06	Yes	No	NA
2921296	AMD1	-0.00258981	0.000534046	1.31816e-06	No	No	NA
2966636	ASCC3	0.00186418	0.000384571	1.33122e-06	No	No	NA
3851776	PRDX2	0.00251834	0.000520131	1.36951e-06	No	No	NA
3907190	SLPI	0.00818059	0.00169072	1.39168e-06	Yes	No	NA
2571457	CKAP2L	0.00247385	0.000511537	1.40854e-06	No	No	NA
2484305	PAPOLG	-0.00189545	0.000392032	1.41678e-06	No	No	NA
3896034	RASSF2	-0.00300878	0.000623087	1.46043e-06	Yes	No	NA
3375840	TUT1	-0.0018874	0.000390979	1.47123e-06	No	Yes	-8.62
2326448	SH3BGRL3	0.00346677	0.000718946	1.51074e-06	Yes	Yes	8.44
3863522	GSK3A	0.0026259	0.000544876	1.53158e-06	No	No	NA
3870054	ZNF160	-0.00276155	0.000573853	1.58538e-06	No	No	NA
3553872	KLC1	-0.00281645	0.000585854	1.6242e-06	Yes	No	NA
2749699	RAPGEF2	-0.00275574	0.000573922	1.67166e-06	Yes	No	NA
2593407	PGAP1	0.00315259	0.000656632	1.67542e-06	No	No	NA
3908786	STAU1	0.00343835	0.000717195	1.73421e-06	No	No	NA
3442941	C3AR1	0.00539121	0.0011251	1.75487e-06	Yes	Yes	11.07
2987441	EIF3B	0.0026006	0.000543	1.77619e-06	Yes	No	NA
3212008	FRMD3	0.00240356	0.0005031	1.88274e-06	No	Yes	11.47
3581132	AKT1	-0.00215406	0.000450916	1.88663e-06	No	No	NA
3850261	ICAM3	-0.00255611	0.000535204	1.8972e-06	No	No	NA
3203086	DDX58	0.00491026	0.00102901	1.93594e-06	No	No	NA
3692856	AMFR	0.00290261	0.000608404	1.94534e-06	No	No	NA
2960010	LMBRD1	-0.00340883	0.00071477	1.962e-06	No	No	NA
2487412	ANXA4	0.00276662	0.000580941	2.02878e-06	Yes	Yes	9.45
3781734	C18orf8	0.00267521	0.000562142	2.06251e-06	No	No	NA
3591327	CCNDBP1	0.00330466	0.000694447	2.06518e-06	No	No	NA
3635125	MTHFS	-0.00353214	0.000742621	2.08941e-06	No	No	NA
3445908	EPS8	0.00234847	0.000494355	2.14892e-06	No	No	NA
2863964	ARSB	0.00231691	0.000489006	2.28526e-06	Yes	No	NA
3206317	ZNF658	-0.015319	0.00323749	2.3563e-06	No	No	NA
2520069	C2orf88	0.0060476	0.00127881	2.38723e-06	Yes	No	NA
3735752	SEC14L1	-0.00261169	0.000552272	2.38809e-06	Yes	No	NA
3078348	EZH2	0.00271526	0.000574373	2.40729e-06	No	No	NA
3674500	ENST00000331346	-0.00578734	0.00122545	2.4634e-06	No	No	NA
3893458	PPDPF	0.00403395	0.000854923	2.51357e-06	No	No	NA
2915491	CYB5R4	-0.00264474	0.000561319	2.59859e-06	No	No	NA
2559649	DUSP11	-0.00244119	0.000518295	2.61904e-06	No	No	NA
3088983	XPO7	0.00406468	0.000863725	2.67113e-06	Yes	No	NA
3088983	XPO7	0.00406468	0.000863725	2.67113e-06	No	No	NA
2838201	PTTG1	0.00484993	0.00103171	2.73846e-06	Yes	Yes	6.45
3226181	ST6GALNAC4	0.00262108	0.000557742	2.75738e-06	No	No	NA
2316245	PRKCZ	-0.00238427	0.000507631	2.79203e-06	Yes	No	NA
+Indicate if the gene contained at least one CpG site that was significantly associated with inflammatory ∆age
*Association with inflammatory ∆age. Beta is in units of one standard deviation change in gene expression per year of inflammatory ∆age
